# Supplementary material
Source: PubMed Central journal article supplement (PMC7196693)
Supplement: UOEH_A_684582_SM6450.pdf [file UOEH_A_684582_SM6450.pdf]

|         | Subject |        |         |          |        | Influenza    | Oral        | Room relative |           | Room        |         | Cough Volume |         |           |           |
|---------|---------|--------|---------|----------|--------|--------------|-------------|---------------|-----------|-------------|---------|--------------|---------|-----------|-----------|
| Subject | # in    | Gender | Age     | Height   | Weight | test results | temperature | humidity      |           | temperature |         | (liters)     |         |           |           |
| ID      | paper   |        | (years) | (inches) | (lbs)  | results      | (deg F)     | (%)           | Session 1 | Visit 1     | Visit 2 | Visit 1      | Visit 2 | Session 1 | Session 1 |
|         |         |        |         |          |        |              | Session 1   | Visit 1       | Visit 2   | Visit 1     | Visit 2 | Visit 1      | Visit 2 | Cough 1   | Cough 2   |
| SH01    | 1       | F      | 20      | 68       | 130    | Positive     | 101.4       | 32            | 26.9      | 21.1        | 21.1    | 21.1         | 21.1    | 1.499     |           |
| SH02    |         | F      | 20      | 63       | 130    | Negative     | 99.3        | 20.9          |           | 19.5        |         | 19.5         |         | 1.809     |           |
| SH03    |         | M      | 19      | 71       | 205    | Negative     | 98.7        | 20            | 28.2      | 20.2        | 21.8    | 20.2         | 21.8    | 3.802     | 3.059     |
| SH04    |         | F      | 19      | 62       | 125    | Negative     | 97.4        | 19.4          |           | 20.2        |         | 20.2         |         | 1.096     | 0.7962    |
| SH05    | 2       | M      | 18      | 74       | 185    | Positive     | 99.8        | 18.7          | 32.3      | 21.3        | 20.4    | 21.3         | 20.4    | 2.742     | 2.817     |
| SH06    | 3       | M      | 19      | 70       | 210    | Positive     | 100.7       | 22.2          | 20.9      | 20.2        | 23.2    | 20.2         | 23.2    | 3.431     | 3.312     |
| SH07    |         | M      | 18      | 72       | 180    | Negative     | 100.1       | 21.9          | 23.5      | 20.6        | 21.3    | 20.6         | 21.3    | 2.398     | 1.776     |
| SH08    | 4       | F      | 18      | 65       | 102    | Positive     | 100.2       | 31.4          | 32.3      | 20.4        | 21.3    | 20.4         | 21.3    | 1.903     | 1.922     |
| SH09    |         | F      | 23      | 67       | 285    | Negative     | 98.7        | 30.4          | 31.7      | 21.1        | 21.3    | 21.1         | 21.3    | 2.046     | 1.922     |
| SH10    |         | F      | 19      | 67       | 183    | Positive     | 98.8        | 33.2          |           | 20.9        |         | 20.9         |         | 2.134     |           |
| SH11    |         | F      | 20      | 70       | 145    | Positive     | 98.2        | 33.9          |           | 20.9        |         | 20.9         |         | 1.772     | 1.655     |
| SH12    | 5       | M      | 22      | 73       | 209    | Positive     | 99.2        | 34.5          | 33.6      | 21.1        | 21.3    | 21.1         | 21.3    | 4.227     | 4.234     |
| SH13    |         | F      | 19      | 68       | 170    | Negative     | 98.7        | 40.8          |           | 21.1        |         | 21.1         |         | 2.129     | 1.935     |
| SH14    |         | F      | 18      | 64       | 125    | Positive     | 100.4       | 41.5          |           | 21.1        |         | 21.1         |         | 1.774     | 1.324     |
| SH15    | 6       | M      | 18      | 68       | 180    | Positive     | 100.3       | 42.1          | 25        | 21.3        | 19.7    | 21.3         | 19.7    | 1.553     | 1.300     |
| SH16    | 7       | M      | 20      | 70       | 155    | Positive     | 99.9        | 40.8          | 24.1      | 21.8        | 20.9    | 21.8         | 20.9    | 2.072     | 0.5737    |
| SH17    |         | M      | 21      | 69       | 145    | Positive     | 98.6        | 41.8          |           | 21.3        |         | 21.3         |         | 1.658     | 1.24      |
| SH18    | 8       | M      | 22      | 69       | 190    | Positive     | 100.4       | 19.4          | 28.8      | 19.5        | 22      | 19.5         | 22      | 3.864     | 3.746     |
| SH19    |         | F      | 18      | 64       | 120    | Positive     | 99          | 18.7          |           | 20.4        |         | 20.4         |         | 2.258     | 2.047     |
| SH20    |         | F      | 18      | 67       | 170    | Negative     | 97.9        | 18.1          | 27.9      | 20.4        | 22      | 20.4         | 22      | 2.179     | 2.151     |
| SH21    |         | F      | 22      | 65       | 120    | Positive     | 99.4        | 16.8          |           | 19.2        |         | 19.2         |         | 2.497     | 2.387     |
| SH22    |         | M      | 19      | 71       | 175    | Positive     | 103         | 16.5          |           | 22          |         | 22           |         | 2.332     | 2.085     |
| SH23    | 9       | F      | 19      | 66       | 130    | Positive     | 98.9        | 16.8          | 23.8      | 23          | 21.1    | 23           | 21.1    | 1.458     | 1.281     |

|           | Cough peak flow rate<br>(liters/sec) |           |           | Cough Volume<br>(liters) |           |           | Cough peak flow rate<br>(liters/sec) |           |           |
|-----------|--------------------------------------|-----------|-----------|--------------------------|-----------|-----------|--------------------------------------|-----------|-----------|
| Session 1 | Session 1                            | Session 1 | Session 1 | Session 2                | Session 2 | Session 2 | Session 2                            | Session 2 | Session 2 |
| Cough 3   | Cough 1                              | Cough 2   | Cough 3   | Cough 1                  | Cough 2   | Cough 3   | Cough 1                              | Cough 2   | Cough 3   |
|           | 3.906                                |           |           | 2.295                    | 1.864     | 2.388     | 3.672                                | 3.119     | 3.914     |
| 2.043     | 6.949                                |           | 6.053     |                          |           |           |                                      |           |           |
| 2.043     | 7.558                                | 4.499     | 6.053     | 4.054                    | 3.391     | 3.759     | 9.321                                | 8.596     | 8.904     |
|           | 4.453                                | 4.419     |           |                          |           |           |                                      |           |           |
| 2.600     | 5.329                                | 5.345     | 5.787     | 3.021                    | 2.615     | 3.407     | 7.114                                | 6.404     | 7.329     |
| 3.439     | 5.771                                | 5.548     | 5.591     | 3.009                    | 1.771     | 1.727     | 6.860                                | 6.956     | 7.722     |
| 1.199     | 5.386                                | 4.199     | 2.892     | 3.474                    | 3.451     | 3.107     | 8.25                                 | 7.123     | 7.795     |
| 1.857     | 4.480                                | 4.844     | 6.189     | 2.078                    | 1.647     | 1.254     | 5.236                                | 3.866     | 3.484     |
| 1.857     | 7.337                                | 4.844     | 6.189     | 1.456                    | 0.6325    | 1.328     | 7.359                                | 2.414     | 7.72      |
|           | 3.871                                |           |           |                          |           |           |                                      |           |           |
| 1.608     | 9.086                                | 9.94      | 7.089     |                          |           |           |                                      |           |           |
| 3.982     | 7.638                                | 7.618     | 6.916     | 4.643                    | 4.467     | 4.406     | 7.232                                | 7.925     | 7.471     |
| 2.37      | 5.824                                | 4.846     | 3.073     |                          |           |           |                                      |           |           |
| 1.333     | 4.792                                | 4.761     | 4.852     |                          |           |           |                                      |           |           |
| 1.287     | 4.465                                | 3.669     | 3.902     | 2.160                    | 1.713     | 1.497     | 7.440                                | 5.159     | 5.206     |
| 1.994     | 7.025                                | 1.667     | 6.739     | 1.467                    | 1.356     | 1.267     | 6.596                                | 7.125     | 6.558     |
| 2.54      | 6.599                                | 5.614     | 6.047     |                          |           |           |                                      |           |           |
| 3.274     | 6.411                                | 5.282     | 5.235     | 2.922                    | 2.754     | 2.606     | 6.366                                | 5.882     | 6.427     |
| 2.593     | 4.947                                | 5.227     | 4.596     |                          |           |           |                                      |           |           |
| 2.295     | 4.474                                | 5.49      | 5.642     | 2.555                    | 2.342     | 2.469     | 7.062                                | 6.739     | 6.976     |
| 1.66      | 6.517                                | 7.295     | 3.897     |                          |           |           |                                      |           |           |
| 1.984     | 6.432                                | 7.427     | 6.379     |                          |           |           |                                      |           |           |
| 1.541     | 4.727                                | 4.106     | 5.014     | 1.479                    | 1.167     | 1.833     | 4.558                                | 3.421     | 5.236     |
