# Supplementary material
Source: PubMed Central journal article supplement (PMC7196693)
Supplement: UOEH_A_684582_SM6452.pdf [file UOEH_A_684582_SM6452.pdf]

| First session (while subject was ill)                                                                      |                                                     |         |         |         |         |         |          |          |          |         |         |         |         |
|------------------------------------------------------------------------------------------------------------|-----------------------------------------------------|---------|---------|---------|---------|---------|----------|----------|----------|---------|---------|---------|---------|
| Subject ID                                                                                                 | SH01                                                | SH01    | SH01    | SH02    | SH02    | SH02    | SH03     | SH03     | SH03     | SH04    | SH04    | SH04    | SH05    |
|                                                                                                            | Cough 1                                             | Cough 2 | Cough 3 | Cough 1 | Cough 2 | Cough 3 | Cough 1  | Cough 2  | Cough 3  | Cough 1 | Cough 2 | Cough 3 | Cough 1 |
| Particle optical diameter (micrometers)                                                                    | Number of particles in each size bin for each cough |         |         |         |         |         |          |          |          |         |         |         |         |
| 0.35 to 0.37                                                                                               | 378.86                                              | 388.57  | 854.86  | 1107.43 | 553.71  | 29.14   | 10812.00 | 12278.86 | 11598.86 | 58.29   | 155.43  | 77.71   | 864.57  |
| 0.37 to 0.4                                                                                                | 417.71                                              | 495.43  | 942.29  | 1729.14 | 553.71  | 48.57   | 12463.43 | 15406.86 | 14076.00 | 29.14   | 68.00   | 145.71  | 884.00  |
| 0.4 to 0.43                                                                                                | 184.57                                              | 524.57  | 796.57  | 1165.71 | 466.29  | 38.86   | 10073.71 | 11501.71 | 11598.86 | 97.14   | 87.43   | 77.71   | 1097.71 |
| 0.43 to 0.46                                                                                               | 291.43                                              | 320.57  | 660.57  | 845.14  | 359.43  | 9.71    | 7878.29  | 8665.14  | 8927.43  | 48.57   | 77.71   | 19.43   | 806.29  |
| 0.46 to 0.5                                                                                                | 340.00                                              | 563.43  | 786.86  | 1068.57 | 417.71  | 38.86   | 10423.43 | 10977.14 | 10637.14 | 29.14   | 58.29   | 87.43   | 777.14  |
| 0.5 to 0.55                                                                                                | 291.43                                              | 544.00  | 854.86  | 942.29  | 437.14  | 19.43   | 11190.86 | 11744.57 | 10957.71 | 19.43   | 48.57   | 48.57   | 1233.71 |
| 0.55 to 0.6                                                                                                | 262.29                                              | 534.29  | 709.14  | 854.86  | 359.43  | 38.86   | 9792.00  | 10957.71 | 10588.57 | 58.29   | 87.43   | 116.57  | 1020.00 |
| 0.6 to 0.7                                                                                                 | 340.00                                              | 738.29  | 796.57  | 952.00  | 369.14  | 0.00    | 10860.57 | 12677.14 | 11705.71 | 77.71   | 87.43   | 126.29  | 1330.86 |
| 0.7 to 0.8                                                                                                 | 155.43                                              | 437.14  | 495.43  | 446.86  | 223.43  | 9.71    | 6877.71  | 7120.57  | 6906.86  | 29.14   | 87.43   | 38.86   | 670.29  |
| 0.8 to 1                                                                                                   | 281.71                                              | 573.14  | 952.00  | 485.71  | 155.43  | 9.71    | 9005.14  | 8956.57  | 9180.00  | 48.57   | 87.43   | 87.43   | 981.14  |
| 1 to 1.2                                                                                                   | 252.57                                              | 174.86  | 476.00  | 252.57  | 77.71   | 0.00    | 4653.14  | 5585.71  | 4896.00  | 29.14   | 87.43   | 38.86   | 971.43  |
| 1.2 to 1.4                                                                                                 | 184.57                                              | 320.57  | 456.57  | 242.86  | 77.71   | 19.43   | 4468.57  | 5925.71  | 5372.00  | 48.57   | 77.71   | 68.00   | 1088.00 |
| 1.4 to 1.7                                                                                                 | 242.86                                              | 505.14  | 417.71  | 301.14  | 165.14  | 19.43   | 5119.43  | 6634.86  | 5576.00  | 29.14   | 106.86  | 48.57   | 806.29  |
| 1.7 to 2.1                                                                                                 | 38.86                                               | 68.00   | 106.86  | 48.57   | 19.43   | 0.00    | 709.14   | 1117.14  | 1126.86  | 0.00    | 9.71    | 29.14   | 281.71  |
| 2.1 to 2.5                                                                                                 | 97.14                                               | 310.86  | 349.71  | 87.43   | 58.29   | 9.71    | 2117.71  | 2914.29  | 2389.71  | 9.71    | 29.14   | 29.14   | 573.14  |
| 2.5 to 3                                                                                                   | 9.71                                                | 116.57  | 9.71    | 19.43   | 9.71    | 0.00    | 136.00   | 223.43   | 213.71   | 0.00    | 0.00    | 0.00    | 58.29   |
| 3 to 3.5                                                                                                   | 0.00                                                | 97.14   | 29.14   | 0.00    | 0.00    | 0.00    | 77.71    | 126.29   | 77.71    | 0.00    | 0.00    | 0.00    | 38.86   |
| 3.5 to 4                                                                                                   | 0.00                                                | 68.00   | 29.14   | 9.71    | 0.00    | 0.00    | 29.14    | 19.43    | 77.71    | 0.00    | 0.00    | 0.00    | 19.43   |
| 4 to 5                                                                                                     | 0.00                                                | 204.00  | 9.71    | 19.43   | 19.43   | 0.00    | 58.29    | 136.00   | 116.57   | 0.00    | 0.00    | 0.00    | 29.14   |
| 5 to 6                                                                                                     | 0.00                                                | 48.57   | 0.00    | 0.00    | 0.00    | 0.00    | 9.71     | 9.71     | 9.71     | 0.00    | 0.00    | 0.00    | 0.00    |
| 6 to 7                                                                                                     | 0.00                                                | 38.86   | 0.00    | 19.43   | 0.00    | 0.00    | 9.71     | 9.71     | 9.71     | 0.00    | 9.71    | 0.00    | 0.00    |
| 7 to 8                                                                                                     | 0.00                                                | 38.86   | 9.71    | 9.71    | 0.00    | 0.00    | 9.71     | 0.00     | 9.71     | 0.00    | 0.00    | 0.00    | 0.00    |
| 8 to 9                                                                                                     | 0.00                                                | 9.71    | 0.00    | 0.00    | 0.00    | 0.00    | 29.14    | 19.43    | 0.00     | 0.00    | 0.00    | 0.00    | 0.00    |
| 9 to 10                                                                                                    | 0.00                                                | 9.71    | 0.00    | 0.00    | 9.71    | 0.00    | 0.00     | 0.00     | 0.00     | 0.00    | 0.00    | 0.00    | 0.00    |
|                                                                                                            |                                                     |         |         |         |         |         |          |          |          |         |         |         |         |
|                                                                                                            |                                                     |         |         |         |         |         |          |          |          |         |         |         |         |
| Second session (after subject had recovered). Note that many subjects did not return for a second session. |                                                     |         |         |         |         |         |          |          |          |         |         |         |         |
|                                                                                                            |                                                     |         |         |         |         |         |          |          |          |         |         |         |         |
| Subject ID                                                                                                 | SH01                                                | SH01    | SH01    |         |         |         | SH03     | SH03     | SH03     |         |         |         | SH05    |
|                                                                                                            | Cough 1                                             | Cough 2 | Cough 3 |         |         |         | Cough 1  | Cough 2  | Cough 3  |         |         |         | Cough 1 |
| Particle optical diameter (micrometers)                                                                    | Number of particles in each size bin for each cough |         |         |         |         |         |          |          |          |         |         |         |         |
| 0.35 to 0.37                                                                                               | 660.57                                              | 320.57  | 748.00  |         |         |         | 3370.86  | 8490.29  | 8801.14  |         |         |         | 87.43   |
| 0.37 to 0.4                                                                                                | 884.00                                              | 514.86  | 971.43  |         |         |         | 4497.71  | 11210.29 | 11637.71 |         |         |         | 126.29  |
| 0.4 to 0.43                                                                                                | 592.57                                              | 417.71  | 582.86  |         |         |         | 3497.14  | 8393.14  | 8140.57  |         |         |         | 48.57   |
| 0.43 to 0.46                                                                                               | 544.00                                              | 388.57  | 544.00  |         |         |         | 2389.71  | 6838.86  | 6625.14  |         |         |         | 77.71   |
| 0.46 to 0.5                                                                                                | 670.29                                              | 369.14  | 563.43  |         |         |         | 2865.71  | 7664.57  | 7382.86  |         |         |         | 77.71   |
| 0.5 to 0.55                                                                                                | 748.00                                              | 621.71  | 699.43  |         |         |         | 3293.14  | 8140.57  | 8383.43  |         |         |         | 116.57  |

|             |        |        |        |  |  |  |         |         |         |  |  |  |       |
|-------------|--------|--------|--------|--|--|--|---------|---------|---------|--|--|--|-------|
| 0.55 to 0.6 | 670.29 | 437.14 | 728.57 |  |  |  | 3468.00 | 8150.29 | 8266.86 |  |  |  | 48.57 |
| 0.6 to 0.7  | 718.86 | 378.86 | 728.57 |  |  |  | 3147.43 | 9121.71 | 9112.00 |  |  |  | 48.57 |
| 0.7 to 0.8  | 378.86 | 291.43 | 446.86 |  |  |  | 1641.71 | 4682.29 | 4060.57 |  |  |  | 29.14 |
| 0.8 to 1    | 738.29 | 310.86 | 427.43 |  |  |  | 2418.86 | 5750.86 | 5401.14 |  |  |  | 9.71  |
| 1 to 1.2    | 427.43 | 184.57 | 310.86 |  |  |  | 1175.43 | 3468.00 | 2885.14 |  |  |  | 9.71  |
| 1.2 to 1.4  | 534.29 | 291.43 | 340.00 |  |  |  | 1952.57 | 5634.29 | 4526.86 |  |  |  | 68.00 |
| 1.4 to 1.7  | 340.00 | 301.14 | 281.71 |  |  |  | 1515.43 | 4060.57 | 2972.57 |  |  |  | 19.43 |
| 1.7 to 2.1  | 38.86  | 29.14  | 68.00  |  |  |  | 233.14  | 602.29  | 485.71  |  |  |  | 29.14 |
| 2.1 to 2.5  | 204.00 | 145.71 | 126.29 |  |  |  | 874.29  | 2078.86 | 1369.71 |  |  |  | 38.86 |
| 2.5 to 3    | 19.43  | 9.71   | 19.43  |  |  |  | 242.86  | 320.57  | 194.29  |  |  |  | 19.43 |
| 3 to 3.5    | 0.00   | 9.71   | 19.43  |  |  |  | 116.57  | 204.00  | 38.86   |  |  |  | 9.71  |
| 3.5 to 4    | 9.71   | 0.00   | 0.00   |  |  |  | 68.00   | 126.29  | 29.14   |  |  |  | 0.00  |
| 4 to 5      | 19.43  | 9.71   | 0.00   |  |  |  | 194.29  | 301.14  | 106.86  |  |  |  | 0.00  |
| 5 to 6      | 0.00   | 0.00   | 0.00   |  |  |  | 87.43   | 87.43   | 48.57   |  |  |  | 0.00  |
| 6 to 7      | 0.00   | 0.00   | 0.00   |  |  |  | 145.71  | 155.43  | 38.86   |  |  |  | 9.71  |
| 7 to 8      | 0.00   | 0.00   | 0.00   |  |  |  | 77.71   | 97.14   | 48.57   |  |  |  | 19.43 |
| 8 to 9      | 0.00   | 0.00   | 0.00   |  |  |  | 48.57   | 48.57   | 19.43   |  |  |  | 0.00  |
| 9 to 10     | 0.00   | 0.00   | 0.00   |  |  |  | 19.43   | 48.57   | 48.57   |  |  |  | 0.00  |



|        |        |         |        |        |        |         |        |        |       |       |        |         |        |  |  |
|--------|--------|---------|--------|--------|--------|---------|--------|--------|-------|-------|--------|---------|--------|--|--|
| 106.86 | 77.71  | 1787.43 | 291.43 | 204.00 | 514.86 | 884.00  | 631.43 | 340.00 | 48.57 | 77.71 | 660.57 | 1321.14 | 767.43 |  |  |
| 97.14  | 68.00  | 1806.86 | 427.43 | 165.14 | 582.86 | 1156.00 | 650.86 | 388.57 | 9.71  | 19.43 | 854.86 | 1777.71 | 689.71 |  |  |
| 38.86  | 58.29  | 767.43  | 194.29 | 155.43 | 291.43 | 582.86  | 281.71 | 174.86 | 19.43 | 9.71  | 514.86 | 932.57  | 388.57 |  |  |
| 97.14  | 38.86  | 1097.71 | 184.57 | 106.86 | 369.14 | 689.71  | 437.14 | 252.57 | 19.43 | 9.71  | 689.71 | 1058.86 | 592.57 |  |  |
| 68.00  | 48.57  | 602.29  | 106.86 | 68.00  | 233.14 | 476.00  | 213.71 | 87.43  | 9.71  | 9.71  | 456.57 | 408.00  | 330.29 |  |  |
| 97.14  | 87.43  | 757.71  | 223.43 | 87.43  | 272.00 | 660.57  | 476.00 | 116.57 | 38.86 | 29.14 | 767.43 | 1058.86 | 495.43 |  |  |
| 87.43  | 116.57 | 670.29  | 126.29 | 97.14  | 242.86 | 427.43  | 427.43 | 58.29  | 0.00  | 19.43 | 612.00 | 777.14  | 427.43 |  |  |
| 9.71   | 9.71   | 68.00   | 19.43  | 29.14  | 38.86  | 29.14   | 29.14  | 48.57  | 0.00  | 0.00  | 68.00  | 38.86   | 48.57  |  |  |
| 97.14  | 68.00  | 116.57  | 77.71  | 29.14  | 145.71 | 233.14  | 272.00 | 68.00  | 0.00  | 0.00  | 320.57 | 233.14  | 174.86 |  |  |
| 9.71   | 29.14  | 29.14   | 29.14  | 9.71   | 29.14  | 58.29   | 29.14  | 0.00   | 0.00  | 0.00  | 48.57  | 19.43   | 19.43  |  |  |
| 9.71   | 19.43  | 0.00    | 9.71   | 9.71   | 9.71   | 29.14   | 9.71   | 0.00   | 0.00  | 0.00  | 9.71   | 0.00    | 9.71   |  |  |
| 9.71   | 9.71   | 0.00    | 9.71   | 0.00   | 0.00   | 19.43   | 9.71   | 0.00   | 0.00  | 0.00  | 9.71   | 9.71    | 9.71   |  |  |
| 19.43  | 58.29  | 9.71    | 19.43  | 29.14  | 19.43  | 38.86   | 9.71   | 0.00   | 0.00  | 0.00  | 9.71   | 0.00    | 0.00   |  |  |
| 29.14  | 38.86  | 0.00    | 0.00   | 0.00   | 9.71   | 58.29   | 9.71   | 0.00   | 0.00  | 0.00  | 0.00   | 0.00    | 9.71   |  |  |
| 9.71   | 19.43  | 0.00    | 19.43  | 0.00   | 9.71   | 38.86   | 29.14  | 0.00   | 0.00  | 0.00  | 0.00   | 9.71    | 9.71   |  |  |
| 9.71   | 19.43  | 0.00    | 0.00   | 0.00   | 0.00   | 9.71    | 0.00   | 0.00   | 0.00  | 0.00  | 0.00   | 0.00    | 0.00   |  |  |
| 19.43  | 0.00   | 0.00    | 0.00   | 0.00   | 0.00   | 9.71    | 0.00   | 0.00   | 0.00  | 0.00  | 0.00   | 19.43   | 0.00   |  |  |
| 9.71   | 0.00   | 0.00    | 0.00   | 0.00   | 0.00   | 0.00    | 9.71   | 0.00   | 0.00  | 0.00  | 0.00   | 9.71    | 9.71   |  |  |







|         |         |         |         |  |  |  |         |         |         |  |  |  |        |
|---------|---------|---------|---------|--|--|--|---------|---------|---------|--|--|--|--------|
| 4682.29 | 3283.43 | 2904.57 | 2584.00 |  |  |  | 6741.71 | 2943.43 | 4896.00 |  |  |  | 437.14 |
| 4964.00 | 3749.71 | 2992.00 | 2865.71 |  |  |  | 8228.00 | 3030.86 | 5644.00 |  |  |  | 408.00 |
| 3166.86 | 2166.29 | 1894.29 | 1855.43 |  |  |  | 3905.14 | 2001.14 | 2768.57 |  |  |  | 213.71 |
| 3458.29 | 2778.29 | 2370.29 | 2321.71 |  |  |  | 4993.14 | 2263.43 | 3769.14 |  |  |  | 233.14 |
| 1816.57 | 1622.29 | 1544.57 | 1078.29 |  |  |  | 3234.86 | 1690.29 | 2399.43 |  |  |  | 204.00 |
| 2010.86 | 1719.43 | 1583.43 | 1486.29 |  |  |  | 6022.86 | 2574.29 | 4400.57 |  |  |  | 262.29 |
| 1564.00 | 1641.71 | 1272.57 | 1020.00 |  |  |  | 3992.57 | 2234.29 | 3157.14 |  |  |  | 204.00 |
| 320.57  | 398.29  | 165.14  | 252.57  |  |  |  | 689.71  | 301.14  | 378.86  |  |  |  | 48.57  |
| 757.71  | 670.29  | 456.57  | 437.14  |  |  |  | 1661.14 | 864.57  | 1466.86 |  |  |  | 106.86 |
| 9.71    | 106.86  | 19.43   | 68.00   |  |  |  | 155.43  | 116.57  | 116.57  |  |  |  | 48.57  |
| 9.71    | 68.00   | 0.00    | 9.71    |  |  |  | 87.43   | 19.43   | 38.86   |  |  |  | 0.00   |
| 9.71    | 9.71    | 9.71    | 0.00    |  |  |  | 38.86   | 0.00    | 29.14   |  |  |  | 0.00   |
| 19.43   | 0.00    | 29.14   | 9.71    |  |  |  | 9.71    | 29.14   | 48.57   |  |  |  | 0.00   |
| 0.00    | 0.00    | 0.00    | 9.71    |  |  |  | 0.00    | 0.00    | 19.43   |  |  |  | 0.00   |
| 0.00    | 0.00    | 0.00    | 19.43   |  |  |  | 0.00    | 19.43   | 0.00    |  |  |  | 0.00   |
| 0.00    | 0.00    | 0.00    | 0.00    |  |  |  | 0.00    | 0.00    | 0.00    |  |  |  | 9.71   |
| 0.00    | 9.71    | 0.00    | 0.00    |  |  |  | 0.00    | 0.00    | 0.00    |  |  |  | 0.00   |
| 0.00    | 0.00    | 0.00    | 0.00    |  |  |  | 0.00    | 0.00    | 0.00    |  |  |  | 0.00   |
